# Supplementary material for: Characterization and Cytotoxic Activity of Microwave-Assisted Extracted Crude Fucoidans from Different Brown Seaweeds
Source: MDPI journal article supplement (doi:10.3390/md21010048), 2023-01-11
Supplement: s1 [file s1]

# Characterization and cytotoxic activity of microwave-assisted extracted crude fucoidans from different brown seaweeds

## Supplementary Figures

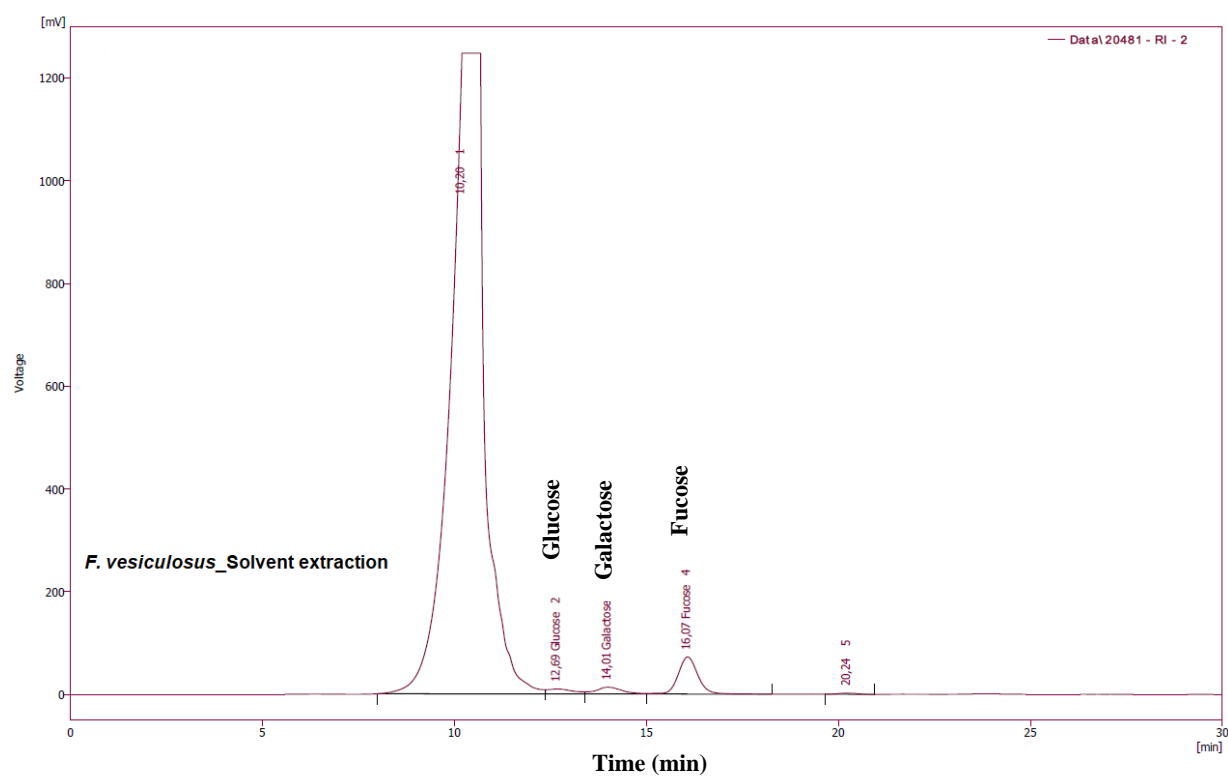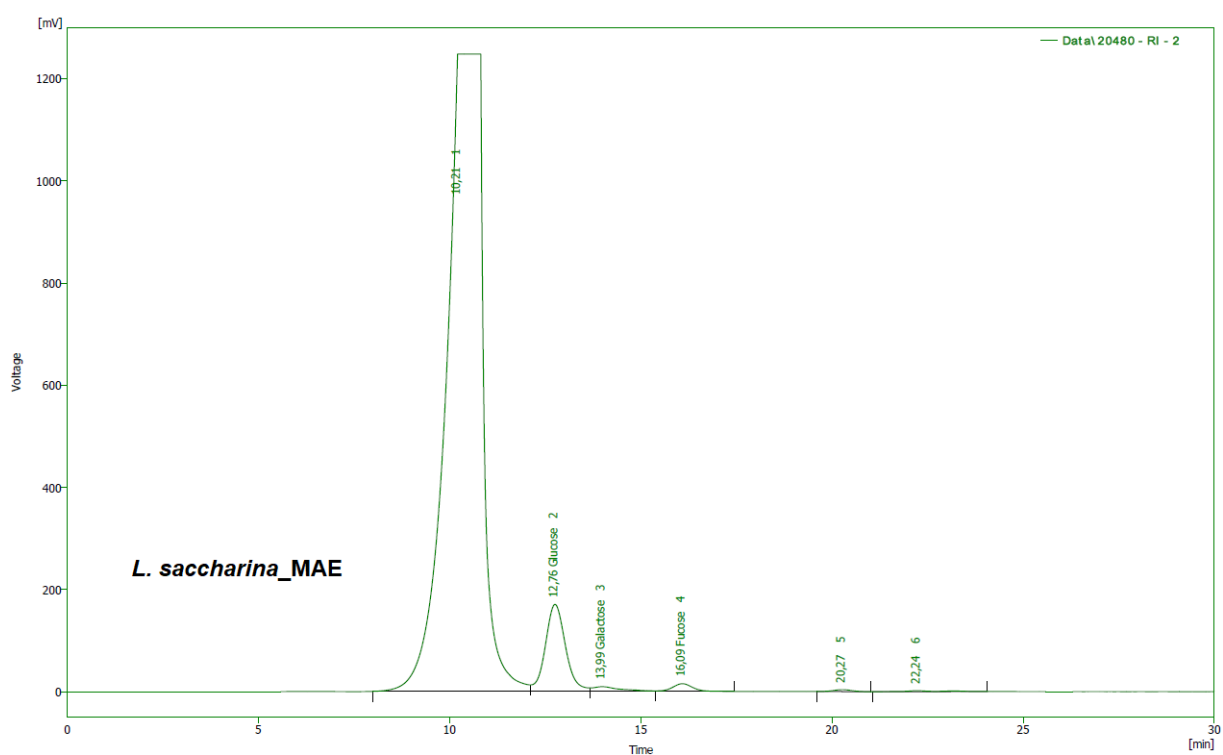

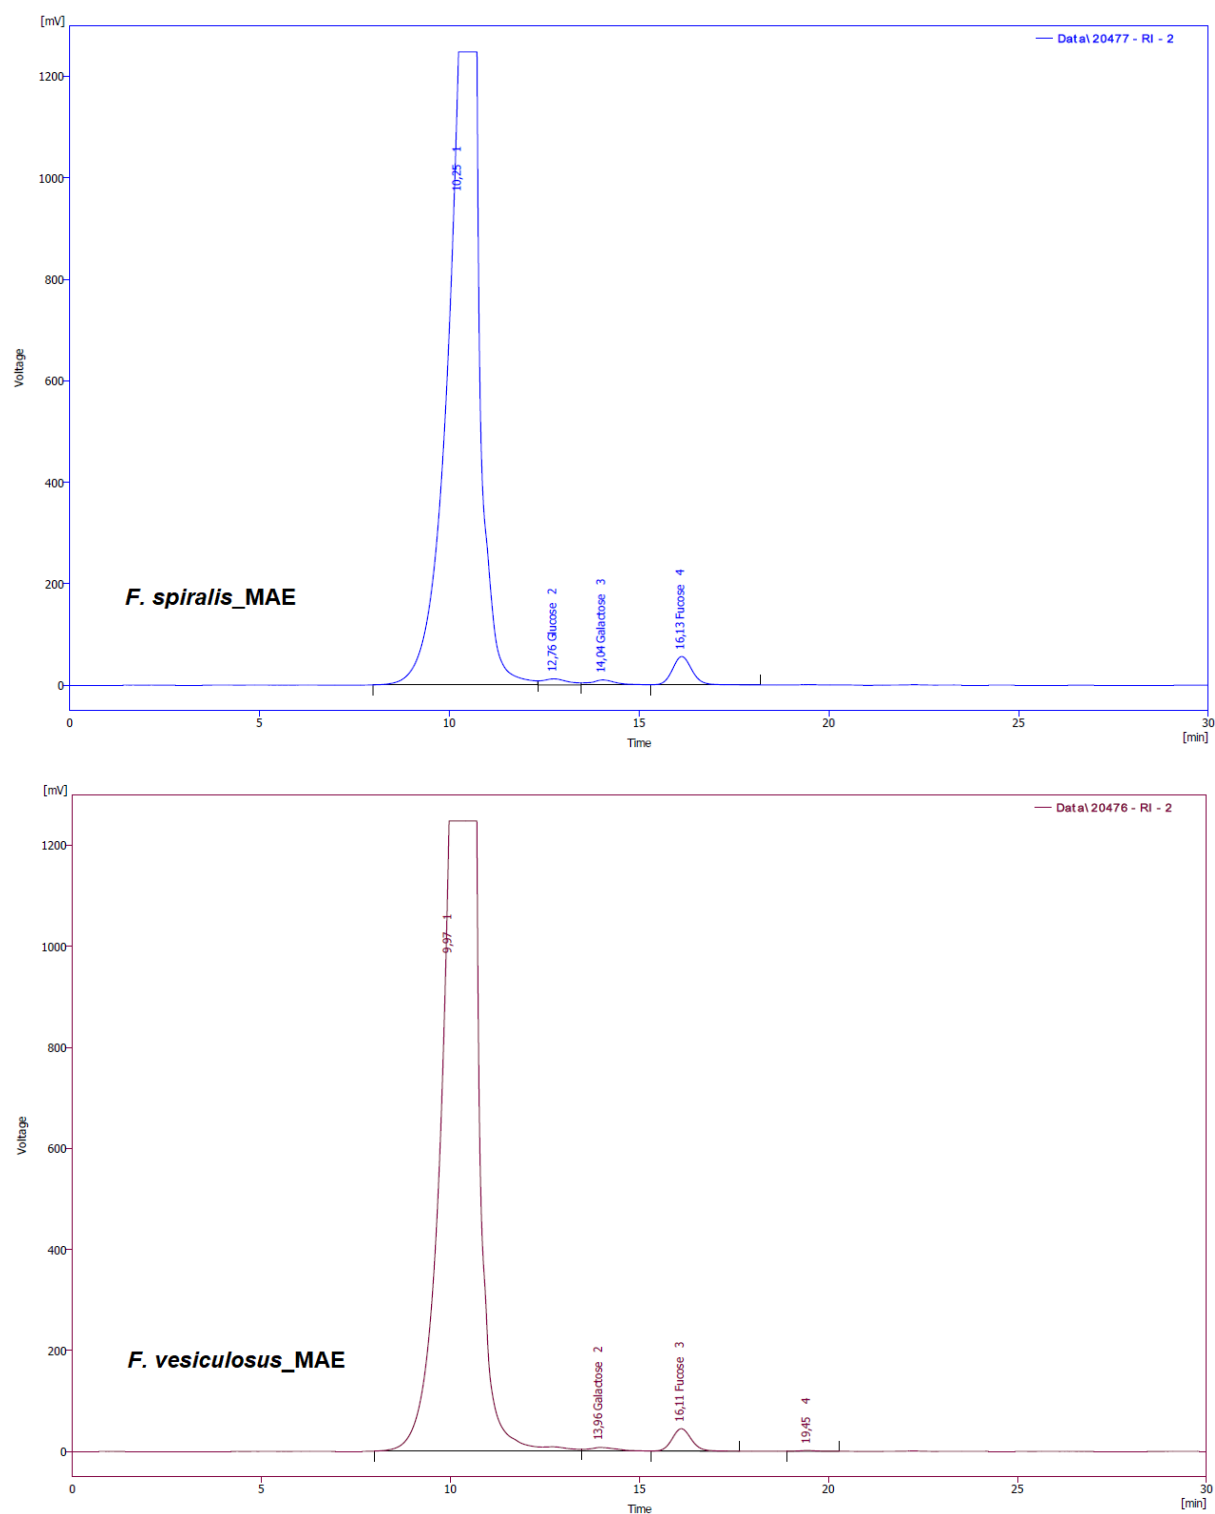

**Figure S1:** Monomeric composition chromatograms of the four investigated brown algae crude fucoidan extracts revealing the ratio between major sugar monomers, *i.e.*, glucose, galactose, and fucose.

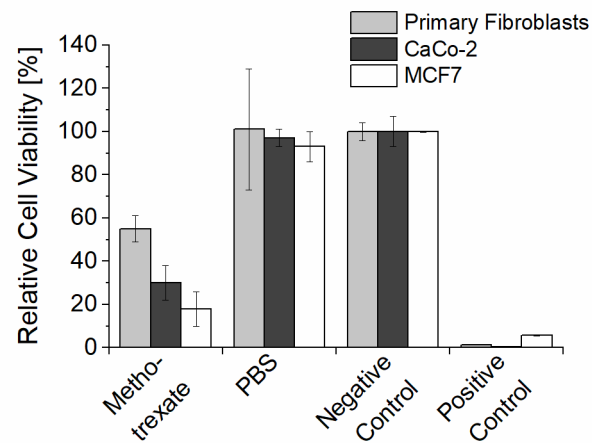

**Figure S2:** Relative cell viability of primary fibroblast (light grey bars), Caco-2 (dark grey bars) and MCF7 (white bars) cells after incubation with control substances: 300  $\mu$ M methotrexate, PBS, cell-specific media (negative control) and SDS (positive control). The relative cell viability was calculated relative to the untreated negative control.

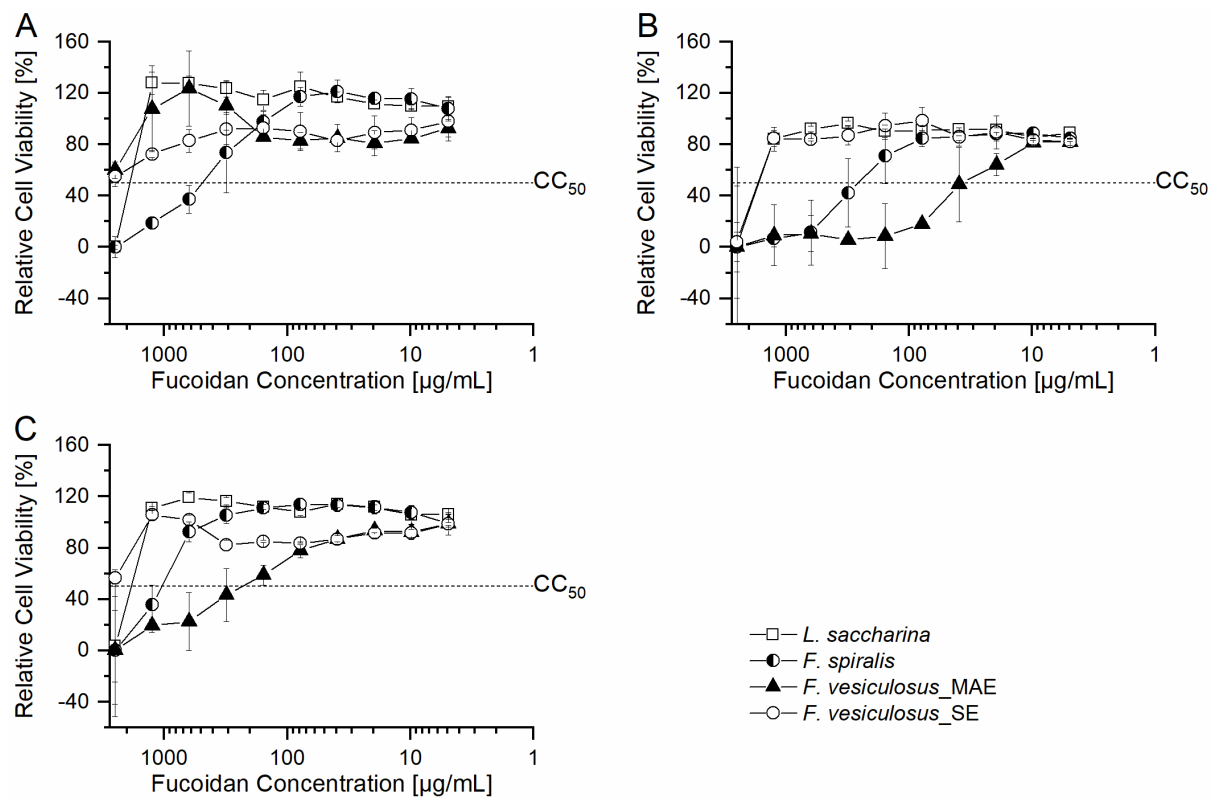

**Figure S3:** Dose-response curves of primary fibroblasts (A), MCF7 cell line (B) and Caco-2 cell line (C) treated with four different fucoidan fractions in concentrations ranging from 4.9 µg/mL to 2500 µg/mL. The relative cell viability was calculated relative to the untreated negative control.

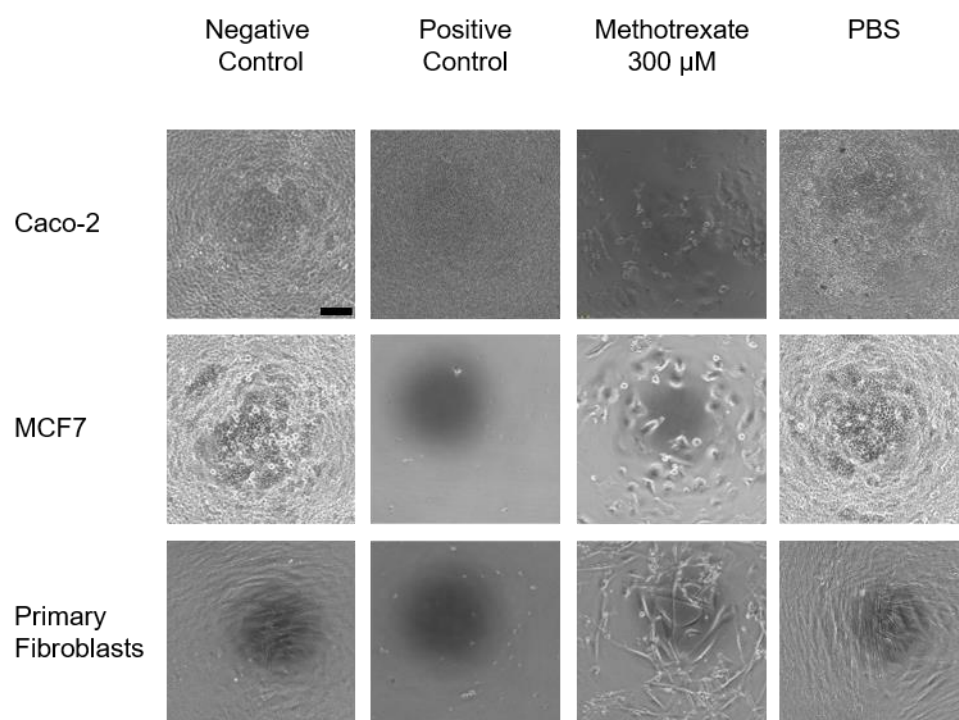

**Figure S4:** Phase contrast images of different cell types (Caco-2 (upper row), MCF7 (middle row), primary fibroblasts (lower row) after incubation with cell specific media (negative control), SDS (positive control), 300  $\mu$ M methotrexate and PBS. The scale bar of the image in the left corner represents 100  $\mu$ m and is representative for all images.

## Supplementary Tables

**Table S1.** Entitled differences of the calculated half-maximal cytotoxic concentration (CC<sub>50</sub>). The CC<sub>50</sub> values within one cell type were compared. Significances are tagged as follows: \* =  $p < 0.05$ , n.s. = not significant ( $p > 0.05$ ), n.d. = not determined (at least one CC<sub>50</sub> amounted  $> 2500 \mu\text{g/mL}$ ).

| <b>CaCo-2</b>              |                           |                            |                    |                      |
|----------------------------|---------------------------|----------------------------|--------------------|----------------------|
|                            | <i>F. vesiculosus</i> _SE | <i>F. vesiculosus</i> _MAE | <i>F. spiralis</i> | <i>L. saccharina</i> |
| <i>F. vesiculosus</i> _SE  | -                         | n.d.                       | n.d.               | n.d.                 |
| <i>F. vesiculosus</i> _MAE | n.d.                      | -                          | *                  | *                    |
| <i>F. spiralis</i>         | n.d.                      | *                          | -                  | *                    |
| <i>L. saccharina</i>       | n.d.                      | *                          | *                  | -                    |
| <b>Primary Fibroblasts</b> |                           |                            |                    |                      |
|                            | <i>F. vesiculosus</i> _SE | <i>F. vesiculosus</i> _MAE | <i>F. spiralis</i> | <i>L. saccharina</i> |
| <i>F. vesiculosus</i> _SE  | -                         | n.d.                       | n.d.               | n.d.                 |
| <i>F. vesiculosus</i> _MAE | n.d.                      | -                          | n.d.               | n.d.                 |
| <i>F. spiralis</i>         | n.d.                      | n.d.                       | -                  | *                    |
| <i>L. saccharina</i>       | n.d.                      | n.d.                       | *                  | -                    |
| <b>MCF7</b>                |                           |                            |                    |                      |
|                            | <i>F. vesiculosus</i> _SE | <i>F. vesiculosus</i> _MAE | <i>F. spiralis</i> | <i>L. saccharina</i> |
| <i>F. vesiculosus</i> _SE  | -                         | *                          | *                  | n.s.                 |
| <i>F. vesiculosus</i> _MAE | *                         | -                          | *                  | *                    |
| <i>F. spiralis</i>         | *                         | *                          | -                  | *                    |
| <i>L. saccharina</i>       | n.s.                      | *                          | *                  | -                    |

**Table S2.** Entitled differences of the calculated half-maximal cytotoxic concentration (CC<sub>50</sub>). The CC<sub>50</sub> values within one fucoidan fraction were compared. For the fucoidan *F. vesiculosus*\_SE no statistical evaluation was possible, since CC<sub>50</sub> values were determined only for MCF7. Significances are tagged as follows: \* =  $p < 0.05$ , n.s. = not significant ( $p > 0.05$ ), n.d. = not determined (at least one CC<sub>50</sub> amounted >2500 µg/mL).

| <i>F. vesiculosus</i> _MAE |                     |      |        |
|----------------------------|---------------------|------|--------|
|                            | Primary Fibroblasts | MCF7 | Caco-2 |
| Primary Fibroblasts        | -                   | n.d. | n.d.   |
| MCF7                       | n.d.                | -    | n.s.   |
| Caco-2                     | n.d.                | n.s. | -      |

| <i>F. spiralis</i>  |                     |      |        |
|---------------------|---------------------|------|--------|
|                     | Primary Fibroblasts | MCF7 | Caco-2 |
| Primary Fibroblasts | -                   | *    | *      |
| MCF7                | *                   | -    | *      |
| Caco-2              | *                   | *    | -      |

| <i>L. saccharina</i> |                     |      |        |
|----------------------|---------------------|------|--------|
|                      | Primary Fibroblasts | MCF7 | Caco-2 |
| Primary Fibroblasts  | -                   | *    | n.s.   |
| MCF7                 | *                   | -    | *      |
| Caco-2               | n.s.                | *    | -      |
